# Supplementary material for: Specific Dietary Components and Gut Microbiota Composition are Associated with Obesity in Children and Adolescents with Prader–Willi Syndrome
Source: MDPI journal article supplement (doi:10.3390/nu12041063), 2020-04-11
Supplement: s1 [file s1]

**a**

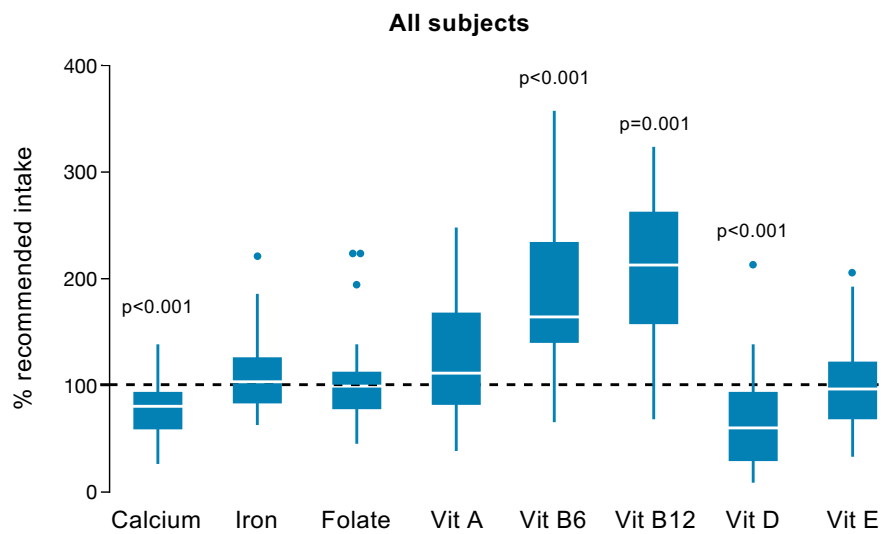

**b**

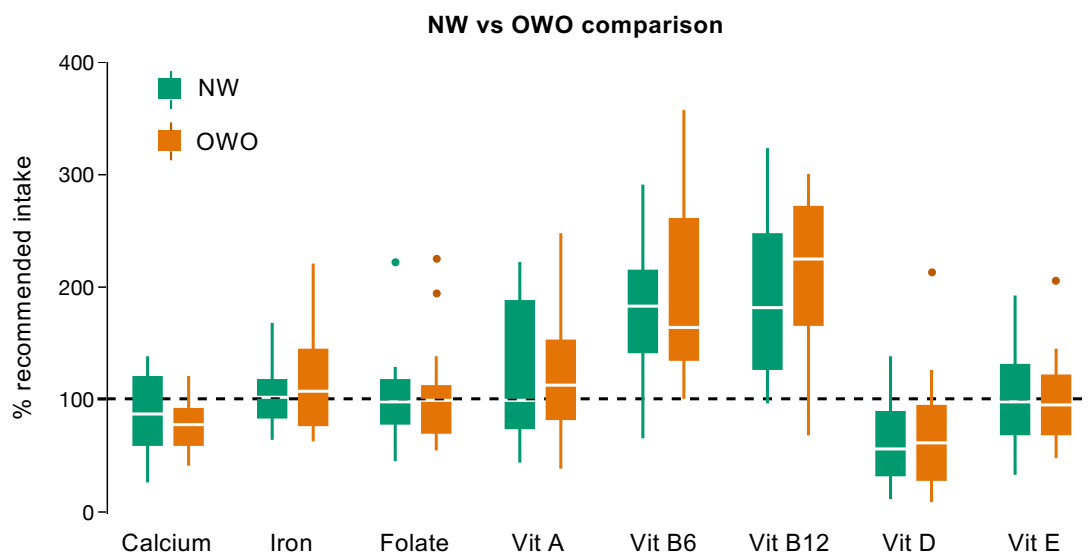

**Figure S1. Micronutrient intake in children and adolescents with Prader-Willi syndrome.**

Micronutrient intake in children with PWS as a percent of daily recommended intake is shown. **a)** Data for all subjects is shown; significance for deviation from the 100% recommended intake for each micronutrient was assessed with one-sample *t*-test comparing the mean intake against a hypothetical mean (100%). **b)** Data for NW (*n*=12, green) and OWO (*n*=19, orange) groups are shown; no statistically significant differences were found between groups (assessed with Student's *t*-test). Box plots represent the median and interquartile ranges.

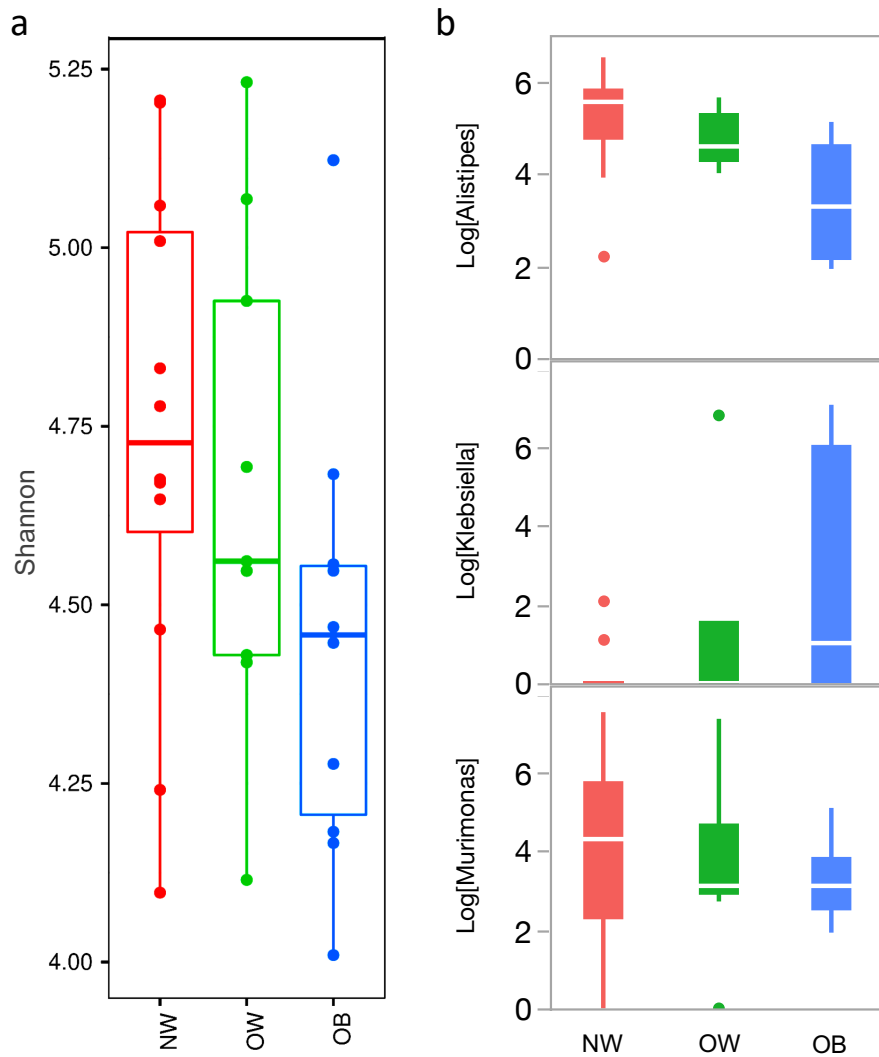

**Figure S2. Microbiome in normal weight, overweight, and subjects with obesity.**  
a) Shannon index indicating  $\alpha$ -diversity in normal weight (NW, n=12, red bars), overweight (OW, n=9, green bars), and subjects with obesity (OB, n=10, blue bars). b) Abundance of Alistipes, Klebsiella, and Murimonas, expressed as log-transformed number of counts.



**Figure S2. Microbiome in normal weight, overweight, and subjects with obesity.** a) Shannon index indicating  $\alpha$ -diversity in normal weight (NW, n=12, red bars), overweight (OW, n=9, green bars), and subjects with obesity (OB, n=10, blue bars). b) Abundance of Alistipes, Klebsiella, and Murimonas, expressed as log-transformed number of counts.
